# Supplementary material for: Neonatal Bedside Laparotomy in the UK: A Multidisciplinary Survey of Practice and Perceptions
Source: Research Square preprint supplement (doi:10.21203/rs.3.rs-8824460/v1), 2026-02-12
Supplement: Supplementary file 1 [file 38bca3c29a4a1771bc68d864.docx]

| **Theme** | **Subtheme** | **Quote** |
| --- | --- | --- |
| **1 Clinical Indications and Decision-Making Factors** | **Clinical situation dependent** | *“Depends on clinical situation, on what the operation is for and needs”* |
| *“Have only seen one cotside laparotomy and baby was in extremis a "hail mary operation"”* |
| **Neonate birthweight, gestation and physiological reserve dependent** | *“In a term or late preterm infant on moderate or less support preference would be in theatre. However, for a smaller preterm infant and infants on high levels of support (e.g. multiple inotropes, iNO, high FiO2 or HFOV) then laparotomy in NICU is preferred”* |
| *“Depends on size and complexity of baby, both locations equally fine (although obviously theatre more set up)”* |
| **Neonate transfer resilience dependent** | *“Guidance- if too unstable to transfer, would consider cotside on NICU”* |
| *“We would operate in theatre, same building, unless they were too unstable to transfer and that would be decided as mdt by surgeon, anaesthetist and neonatologist”* |
| **Speed and delay dependent** | *“you've missed the most important one - the need for speed to surgical incision - this should not be about surgical preference”* |
| **Balancing sickness with cotside constraints** | *“Depends on the situation, we are not well set up for operating on the unit, with not much space, but if very sick then I would always raise it as an option”* |
| *“Depends on surgical diagnosis, stability, mode of ventilation, weight/ CGA etc. ~100% of NEC/ SIP laparotomies done on NICU, as well as all open CDH repairs, ECMO cannulations etc. Extreme pre-terms always NICU. Potential trade off in neonates with more advanced CGA and weight in terms of marginally improved space, lighting, ergonomics in theatre.”* |
|  | *“within our centre, we have had cases where decision for theatre has been contentious with a neonate ultimately dying (possibly predictably - either in theatre or very soon after return to the NNU) and on reflection/M&Ms a discussion/point has been made around whether operating on such babies at the cotside would be more appropriate if operative interventions are pursued. At the time, physical space/familiarity was a barrier to this taking pace”* |
| **Tripartite MDT decision making** | *“Meets criteria for operating on NICU (based on current weight, clinical condition & support required) & tripartite agreement (neonatal + anaesthetic + surgical)”* |
| *“Joint discussion and decision of neonatal, surgical and anaesthetic teams. Generally, no one team has overall say.”* |
| *“We would operate in theatre, same building, unless they were too unstable to transfer and that would be decided as mdt by surgeon, anaesthetist and neonatologist”* |
| *“I feel we have a good set up where the decision is made on a specific patient basis. If any team member expresses concern then we stay on NICU. NICU and theatre staff all experienced with it being done there and know process. Often feels more uncomfortable and as anaesthetist I’m further away from the baby, but this is more than balanced by benefits of not moving baby”* |
| *“Timing - sometimes decisions for location vary according to time within a shift and people involved in decisions, which may change again when a different group discuss a few hours later.”* |
| **2 NICU Infrastructure and Geography** | **Poor Lighting on NICU** | *“lighting not as good, doesn't replicate theatres”* |
| *“Inadequate lighting on NNU.”* |
| **Limited NICU Space/ not fit for purpose** | *“NICU environment space around the cot tight , currently undergoing expansion to support this better”* |
| *“Space on the neonatal unit as opposed to purpose-made surgical theatre (eg control of air flow).”* |
| **NICU Infection Concerns** | *“Our major concern is lack of environmental sterility in cot side operations, although no evidence to show increased infection rates.”* |
| *“Infection issues with water supply in NNU”* |
| *“cotside surgery is deemed inappropriate due to the number of air exchanges in our NICU rooms increasing the risk of infection”* |
| **Disturbance to NICU functioning/ other families** | *“Occasionally NICU staff nurses have raised concerns about impeding other families access to their own baby and the theatre staff sometimes express a preference for going to theatre, but this is never persistent or non-negotiable.”* |
| *“Demands on ICU nursing staff to support care of other neonates and laparotomy simultaneously”* |
| *“Also the impact on the rest of the unit when operating, as we essentially shut off large areas to relatives etc”* |
| **Lack of NICU staff familiarity** | *“Nicu staff don’t always understand transition to operating theatre environment. Delay, sterility breached, interference (rustling under drapes)”* |
| **Proximity/ co-location of NICU and Theatre precludes transfer risks** | *“We routinely perform all emergency laparotomies in theatre as it is less than 20m from our NNU”* |
| *“Our PICU is very close to theatres on the same corridor so less of an issue to move babies.”* |
| *“Location of the unit and theatres seems to be the major concern which does not affect us. Co-location of NNU and theatres lends itself to ongoing excellent communication and skills sharing between neonatology, surgical and anaesthetic teams.”* |
| **3a Safety and adverse events: COTSIDE** | **No adverse events to operating cotside** | *“no, all have gone well so far.”* |
| *“Honestly no. I'm not just saying that”* |
| *“No, we have set of instruments, theatre lights, and equipment set aside specifically for neonatal laparotomy on PICU”* |
| *“None in my personal experience but it’s done only very rarely in unstable neonates with poorer expected outcomes.”* |
| *“No , good thermoregulation, stabilisation, and minimal disturbance to patient”* |
| **Issues with blood accessibility and major haemorrhage management cotside** | *“Lack of knowledge of theatre processes so delay putting out major haemorrhage call”* |
| *“Definitely more difficult to get blood when we need it though”* |
| *“Major haemorrhage, much more difficult to manage surgically due to space and light”* |
| *“Liver bleed contributed to by poor vision due to lighting”* |
| **Delayed processes cotside** | *“No poor outcomes, but have had delays when problems with kit (takes 5-10mins to run to main theatres and back)”* |
| *“Surgery delayed whilst preparations/decisions made”* |
| **Personnel**  **limitations cotside** | *“Distraction of team towards patient receiving laparotomy”* |
| *“Stretching neonatal nursing team capacity”* |
| **3b Safety and adverse events: THEATRE/ TRANSFER** | **Neonatal Physiological deterioration on transfer** | *“Hypothermia is the main one”* |
| *“Lots of datixes around hypothermia”* |
| *“significant cardiorespiratory instability on handling to transfer to operating table requiring brief CPR and adrenaline”* |
| *“Thermal regulation (too cold), problems with ventilatory management ( mostly for small and extreme preterm infants, higher PIPs , no gases taken perioperatively, and high Co2 on return”* |
| *“Cold baby; airway compromise; bolus fluid administration through central lines in non sterile fashion. Lack of recognition of non functioning lines”* |
| *“Temperature control; blocked PICC lines; inappropriate ventilators/ventilation; inappropriate oxygenation; unrecognised pneumothorax”* |
| *“thermoregulation, extubation in recovery , apneas during transfer , infusion rate errors, lack of clarity of handover information”* |
| **Different Ventilators in NICU, transfer and in theatre** | *“Our anaesthetic machines cannot ventilate neonates as well as the ventilators in PICU. If we transfer to theatres we either have to take the ventilator or hand bag the child to theatres. Often resulting in worsening of ventilation or potential over/under ventilation via hand ventilation”* |
| *“difficulties in ventilating < 500g babies due to ventilators not being as good as on NICU/PICU”* |
| *“New ventilators apparently much better from an extreme pre-term neonate perspective. Older ones were more challenging I believe”* |
| *“theatre ventilators not able to deliver small tidal volumes”* |
| **Extubation and tube dislodgement** | *“dislodging of ETT in low birth weight babies < 500g on transfer”* |
| *“there have been difficult reintubations, but the co-location does mean that our anaesthetists can call for a neonatologist (and do) when required”* |
| *“ET tube displacement. Emergency intubation in the lift”* |
| *“Accidental extubation in theatre. No harm to baby”* |
| **Logistical issues related to delayed transfers** | *“difficult and time-consuming coordination via Teams conference calls”* |
| *“long delays in arriving in theatre where cepod theatre unable to be utilised for other emergencies.”* |
| *“large delays waiting for transport. Out of hours NICU ring 999 for an ambulance which causes huge delays”* |
| **4 Professional Preference and culture** | **Preference to operate in theatre** | *“No, I feel it is always better to operate in a theatre”* |
| *“Would always advocate laparotomy in theatre, and so that will have influenced my responses. I do not feel laparotomies should take place outside theatre. It wouldn't be considered in a child or an adult patient”* |
| *“My surgeons would like me to communicate they much prefer to be in theatre during to lack of space and proper lights in NICU. They feel very strongly about this”* |
| *“Our surgeons feel their interventions are limited by operative conditions (influenced by lighting and equipment) and that definitive procedures (which may be less emergent) can only be carried out in theatre.”* |
| **Preference to operate cotside** | *“Our damage control pathway is always cotside surgery”* |
| *“For unstable, small babies, with acute pathology like NEC perforation when damage control surgery is preferred i believe cotside is best. For more complex, urgent cases theatre is preferred. Unfortunately despite <100m distance, ambulance transfer is currently required”* |
| *“I think transfer of extremely preterm infants into a transport incubator, then onto an operating table in a cooler environment like the operating theatre, has to have a significant impact on the neonate. Handling alone might be a stress factor for sick small neonates. If sterility and privacy as well as space for the operating team can be created, it might be more beneficial for the babies to be operated on the unit in those cases.”* |
| **Reluctance to operate cotside due to perceived risks, comfort zones and prior experience** | *“It is practical but there is sometimes surgical reticence to do so due to perceived increased technical risk.”* |
| *“Out of comfort zone for neonatal nurses and some neonatologists”* |
| *“There is little "institutional" experience of this. Individual clinicians may have experience largely from other centres but support staff (nursing/theatre etc) not as much. as such, the option of on unit operating is not really at the forefront of people's minds/decision making.”* |
| *“Lack of experience/need for cultural change of all healthcare professionals involved”* |
| **5 Governance, Guidelines and Standard Operating Practices (SOPs)** | **Introduction of SOPs and guidelines as a success factor** | *“Since launching a guideline in 2019 on operating on nicu, we perform almost 100% laparotomies on <1.5kg babies on nicu. This has vastly improved our service and the quality of care delivered to these vulnerable babies. Surgeons very supportive.”* |
| *“Increased technical risks (to operating cotside) ticked above because performing a procedure outside not within the usual environment carries a probably very low, but unquantifiable risk. To mitigate this we have developed a SOP for our unit”* |
| *“Operating on NICU is the norm for <1kg / physiologically unstable babies and the decision to do so is based on a tripartite agreement from neonatal + anaesthetic + surgical consultants according to an agreed SOP written by the perioperative MDT”* |
| **Guideline development planned/ in progress** | *“We are actively preparing an SOP for cotside Operations so that when it happens it is slick and easy to do”* |
| *“This piece of work in currently in progress”* |
| **Expression of interest/ active exploration of cotside operating underway** | *“We are looking to move to a model of on-unit laparotomies with the opening of the new neonatal intensive care unit”* |
| *“We have just gone through approval process to start cotside operating on NICU but not yet had a suitable patient.”* |
| *“We are currently reviewing this following several complex cases”* |
| *“Previously the surgeons had not been keen to do this but now the surgical team are keen to commence NICU operating but it took a year to get through the approval process.”* |
| **Need to show clear benefits of cotside operating before adoption** | *“Because we have always transported babies our team is very good so it has been difficult to show significant safety problems with the previous system. Our centre is in the process of setting up cotside operating on NICU and this has broad support from surgeons, neonatologists and anaesthetists. We will be auditing to check that we maintain our current outcomes.”* |
| **6 Education, Innovation and Success factors** | **Simulated NICU Laparotomies** | *“There is a joint NICU/Surgical/Anaesthetic taskforce currently trialling SIM laparotomies to test the feasibility of being able to offer cotside operations.”* |
| **Collaboration as a factor for successful cotside operating** | *“Wherever a procedure takes place, it seems the care improves with closer liaison and communication between teams. If neonatal nursing was 1:1 by default, then I would love to think that virtually all emergency laparotomies could take place on NICU.”* |
| *“This is a good idea. I think it would be important to seek the views of the wider multi-professional team - anaesthetics, theatre staff, transport teams, intensivists, neonatologists ODPs and nursing staff”* |
| **Key equipment availability** | *“Space and access to the airway is key. Ideally the availability of anaesthetic gases machine should be part of the provision for surgical NICU.”* |
| **Clear guidelines/ trainable pathways** | *“Works best when clear policies established and practiced by all staff”* |
| *“Embedded standard practice to operate at cotside , neonatal nurses and staff trained in standard practice , presence of surgical nurse specialists on shift to support checklist,. NIL Neonatal immediate laparotomy pathway to reduce time to surgery on site on NICU. Overall improved patient experience”* |
